# Supplementary material for: A Novel L-Shaped Fluorescent Probe for AIE Sensing of Zinc (II) Ion by a DR/NIR Response
Source: MDPI journal article supplement (doi:10.3390/molecules26237347), 2021-12-03
Supplement: s1 [file s1]

# A Novel L-Shaped Fluorescent Probe for AIE Sensing of Zinc (II) Ion by a DR/NIR Response

Rosita Diana <sup>1</sup>, Ugo Caruso <sup>2</sup>, Francesco Silvio Gentile <sup>2</sup>, Luigi Di Costanzo <sup>1</sup> and Barbara Panunzi <sup>1,\*</sup>

<sup>1</sup> Department of Agriculture, University of Napoli Federico II, 80055 Portici, NA, Italy; rosita.diana@unina.it (R.D.); luigi.dicostanzo4@unina.it (L.D.C.)

<sup>2</sup> Department of Chemical Sciences, University of Napoli Federico II, 80126 Napoli, Italy; ugo.caruso@unina.it (U.C.); francesco.gentile@unina.it (F.S.G.)

\* Correspondence: barbara.panunzi@unina.it; Tel.: +39-081-674-170

## SUPPLEMENTARY MATERIAL

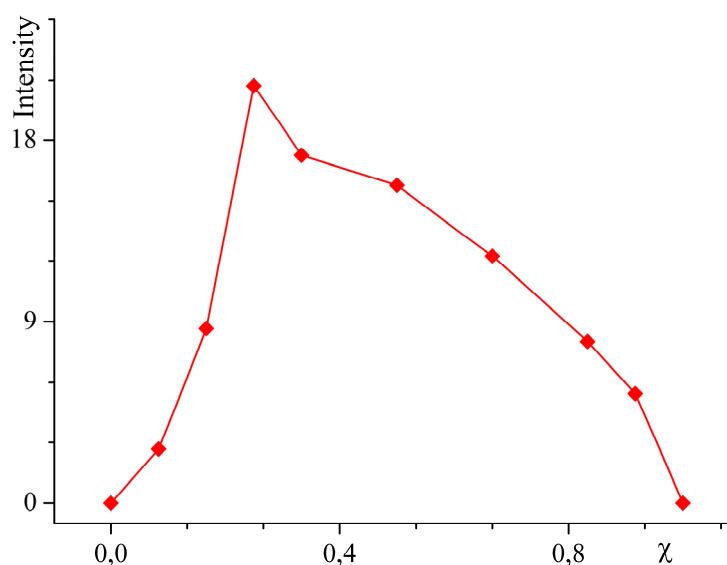

**Figure S1.** Job's plot for the L-zinc (II) adduct ( $\chi = [\text{Metal}]/[\text{Metal}] + [\text{Ligand}]$ ).

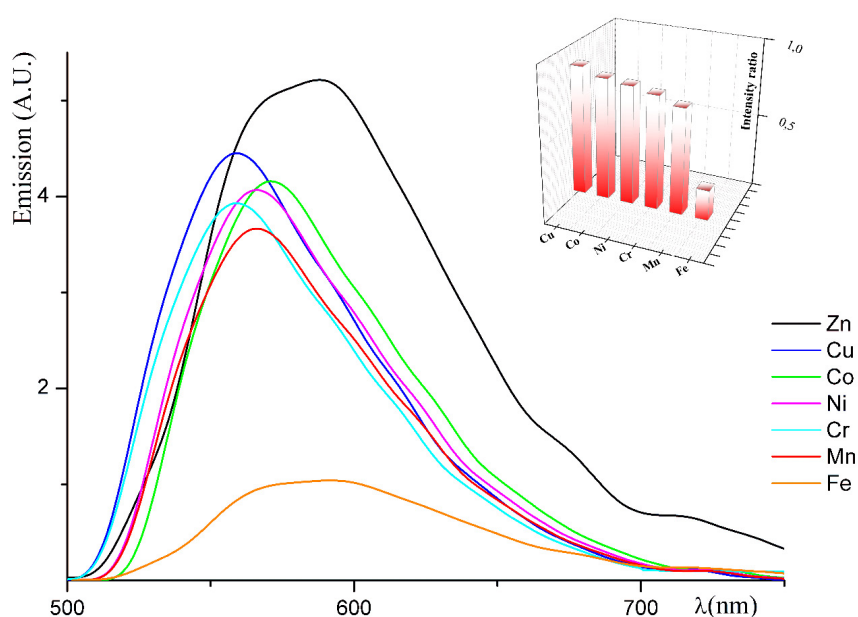

**Figure S2.** Fluorescence spectra of  $L_2Zn$  in presence of 1 equivalent of interferent transition metal ions in 200 mM ethanolic solutions. In the inset: quantitative representation by the interferogram curve.

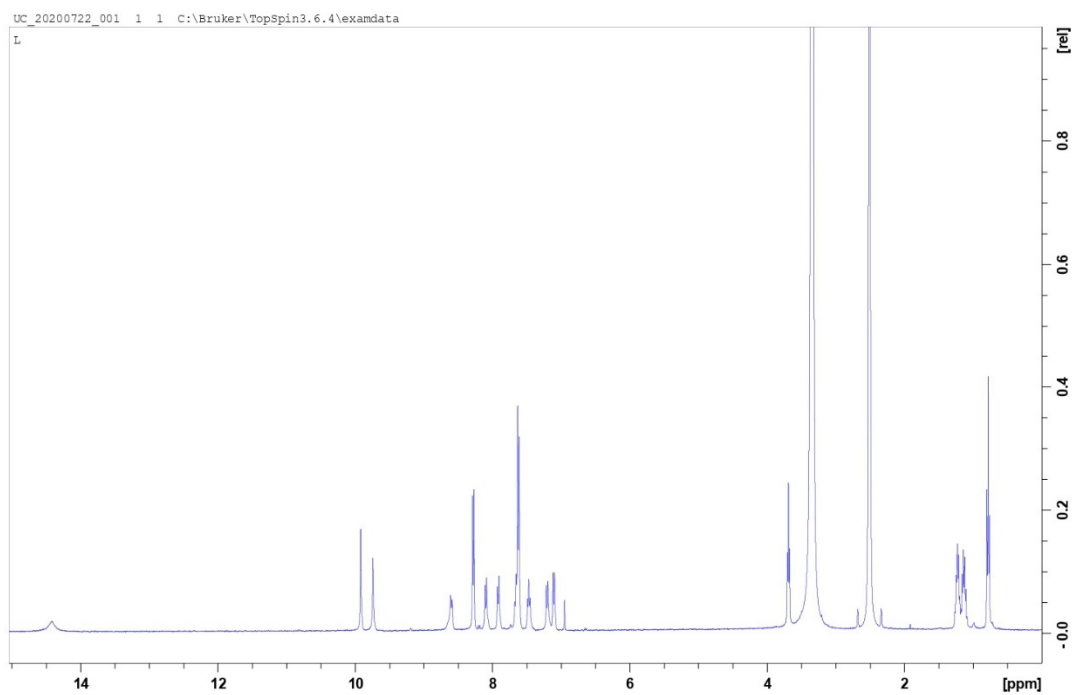

Hard copy of the  $^1\text{H}$  NMR (400 MHz, DMSO- $d_6$ , 25  $^\circ\text{C}$ , ppm) spectrum of L.

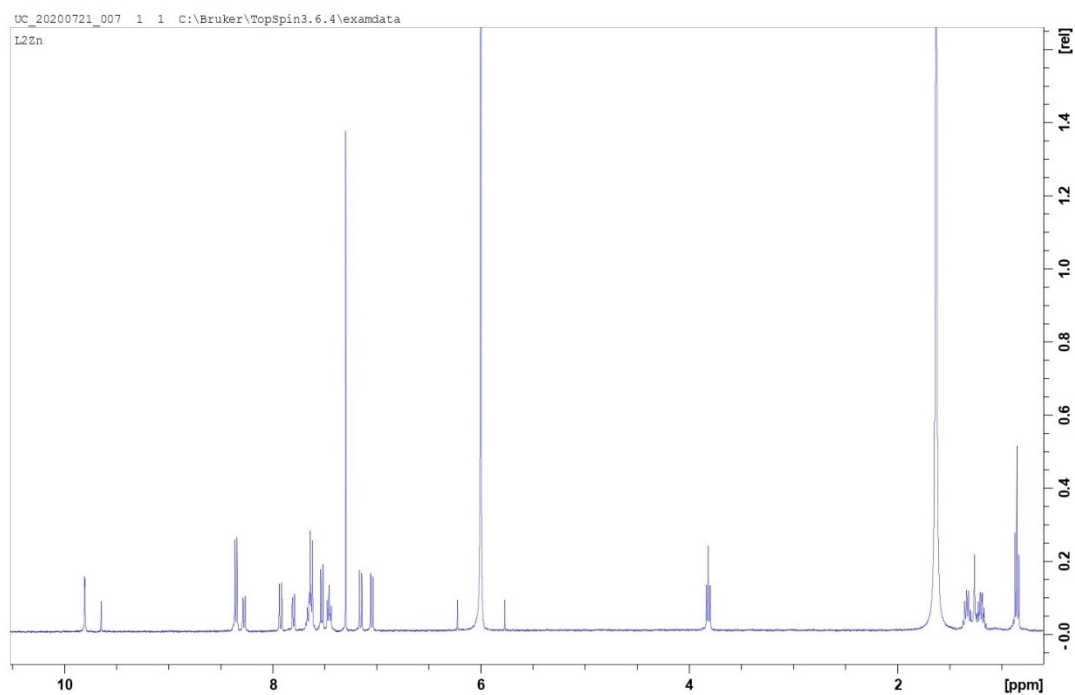

Hard copy of the  $^1\text{H}$  NMR (400 MHz, DMSO- $d_6$ , 25  $^\circ\text{C}$ , ppm) spectrum of L<sub>2</sub>Zn.
